# Supplementary material for: Sulfonated Polyether Ketone Membranes Embedded with Nalidixic Acid—An Emerging Controlled Drug Releaser
Source: MDPI journal article supplement (doi:10.3390/polym15173631), 2023-09-01
Supplement: s1 [file s1]

## SUPPORTING INFORMATION

# Sulfonated Polyether Ketone Membranes Embedded with Nalidixic Acid – An Emerging Controlled Drug Releaser.

Himabindu Padinjarathil <sup>1,2</sup>, Vidya Vilasini <sup>1</sup>, Rajalakshmi Balasubramanian <sup>1</sup>, Carmelo Drago<sup>3</sup>, Sandro Dattilo <sup>4,\*</sup> and Prasanna Ramani <sup>1,5,\*</sup>

<sup>1</sup> Dhanvanthri Laboratory, Department of Sciences, Amrita School of Physical Sciences, Coimbatore 641112, Amrita Vishwa Vidyapeetham, India

<sup>2</sup> Department of Chemical Engineering and Materials Science, Amrita School of Engineering, Coimbatore 641112, Amrita Vishwa Vidyapeetham, India

<sup>3</sup> Institute of Biomolecular Chemistry, CNR, via Paolo Gaifami 18, I-95126 Catania, Italy; carmelo.drago@cnr.it

<sup>4</sup> Institute for Polymer, Composite and Biomaterials, CNR, via Paolo Gaifami 18, I-95126 Catania, Italy

<sup>5</sup> Center of Excellence in Advanced Materials and Green Technologies (CoE-AMGT), Amrita School of Engineering, Coimbatore 641112, Amrita Vishwa Vidyapeetham, India

\* Correspondence: sandro.dattilo@cnr.it (S.D.); r\_prasanna1@cb.amrita.edu (P.R.)

**Table S1:** Data showing the selection of model in RSM**Response 1: Degree of sulphonation**

| Source    | Sequential p-value | Lack of Fit p-value | Adjusted R <sup>2</sup> | Predicted R <sup>2</sup> |                  |
|-----------|--------------------|---------------------|-------------------------|--------------------------|------------------|
| Linear    | 0.0097             |                     | 0.4066                  | 0.1199                   |                  |
| 2FI       | < 0.0001           |                     | <b>0.8838</b>           | <b>0.2893</b>            | <b>Suggested</b> |
| Quadratic | <b>0.0004</b>      |                     | <b>0.9666</b>           | <b>0.9079</b>            |                  |

**Sequential Model Sum of Squares**

| Source           | Sum of Squares | df       | Mean Square   | F-value      | p-value            |                  |
|------------------|----------------|----------|---------------|--------------|--------------------|------------------|
| Mean vs Total    | 4709.07        | 1        | 4709.07       |              |                    |                  |
| Linear vs Mean   | 2664.30        | 3        | 888.10        | 5.34         | 0.0097             |                  |
| 2FI vs Linear    | <b>2237.44</b> | <b>3</b> | <b>745.81</b> | <b>22.89</b> | <b>&lt; 0.0001</b> | <b>Suggested</b> |
| Quadratic vs 2FI | 320.58         | 2        | 160.29        | 17.12        | 0.0004             |                  |
| Residual         | 102.97         | 11       | 9.36          |              |                    |                  |
| Total            | 10034.36       | 20       | 501.72        |              |                    |                  |

**Table S2:** ANOVA for the 2FI model for response Degree of sulphonation in RSM.

| Source          | Sum of Squares | df | Mean Square | F-value | p-value  |                    |
|-----------------|----------------|----|-------------|---------|----------|--------------------|
| Model           | 4901.74        | 6  | 816.96      | 25.08   | < 0.0001 | <b>significant</b> |
| A-Concentration | 202.45         | 1  | 202.45      | 6.21    | 0.0270   |                    |
| B-Temperature   | 2027.73        | 1  | 2027.73     | 62.24   | < 0.0001 |                    |
| C-Time          | 1843.89        | 1  | 1843.89     | 56.60   | < 0.0001 |                    |
| AB              | 880.34         | 1  | 880.34      | 27.02   | 0.0002   |                    |
| AC              | 146.40         | 1  | 146.40      | 4.49    | 0.0538   |                    |
| BC              | 1114.78        | 1  | 1114.78     | 34.22   | < 0.0001 |                    |
| Residual        | 423.55         | 13 | 32.58       |         |          |                    |
| Cor Total       | 5325.28        | 19 |             |         |          |                    |

Factor coding is **Coded**.Sum of squares is **Type III – Partial****Table S3:** Data showing the coefficients in terms of coded factors in RSM

| Factor          | Coefficient Estimate | df | Standard Error | 95% CI Low | 95% CI High | VIF   |
|-----------------|----------------------|----|----------------|------------|-------------|-------|
| Intercept       | 87.86                | 1  | 9.80           | 66.68      | 109.04      |       |
| A-Concentration | 17.56                | 1  | 7.05           | 2.34       | 32.78       | 22.85 |
| B-Temperature   | 82.17                | 1  | 10.42          | 59.67      | 104.68      | 30.35 |
| C-Time          | 90.23                | 1  | 11.99          | 64.32      | 116.14      | 37.06 |
| AB              | 20.03                | 1  | 3.85           | 11.70      | 28.35       | 2.56  |
| AC              | 20.67                | 1  | 9.75           | -0.3955    | 41.73       | 39.77 |
| BC              | 66.59                | 1  | 11.38          | 42.00      | 91.18       | 31.63 |

**Table S4:** Data showing the First order, Zero order kinetic, Hopfenberg Model (Erosion Coefficient (m/h) and Ritger -Peppas model of SPEK membrane with Nalidixic acid sodium 1 to 6 hr period.

|                |                                       |                                                        | Zero order kinetic/<br>First order | Ritger -Peppas | Hopfenberg Model      |
|----------------|---------------------------------------|--------------------------------------------------------|------------------------------------|----------------|-----------------------|
| Time<br>(mins) | Amount of<br>drug<br>released<br>(mg) | Amount of<br>drug left in<br>t*60e<br>membrane<br>(mg) | fi=1-(Wi/Wo)                       | n=mi/mo/ko/t   | mt/mo=1-[1-k0t/CoAo)n |
| 60             | 0.95                                  | 6.05                                                   | 3.76*10 <sup>-5</sup>              | 1              | 5.96*10 <sup>-6</sup> |
| 120            | 1                                     | 6                                                      | 1.98*10 <sup>-5</sup>              | 1              | 3.14*10 <sup>-6</sup> |
| 180            | 1.1                                   | 5.9                                                    | 1.45*10 <sup>-5</sup>              | 1              | 2.3*10 <sup>-6</sup>  |
| 240            | 1.15                                  | 5.85                                                   | 1.14*10 <sup>-5</sup>              | 1              | 1.8*10 <sup>-6</sup>  |
| 300            | 1.15                                  | 5.85                                                   | 9.12*10 <sup>-6</sup>              | 1              | 1.44*10 <sup>-6</sup> |
| 360            | 1.15                                  | 5.85                                                   | 7.6*10 <sup>-6</sup>               | 1              | 1.2*10 <sup>-6</sup>  |
| 1260           | 1.35                                  | 5.65                                                   | 2.556*10 <sup>-6</sup>             | 1              | 4*10 <sup>-7</sup>    |
| 1320           | 1.35                                  | 5.65                                                   | 2.43*10 <sup>-6</sup>              | 1              | 3.9*10 <sup>-7</sup>  |
| 1380           | 1.35                                  | 5.65                                                   | 2.32*10 <sup>-6</sup>              | 1              | 3.7*10 <sup>-7</sup>  |
| 1440           | 1.35                                  | 5.65                                                   | 2.223*10 <sup>-6</sup>             | 1              | 3.5*10 <sup>-7</sup>  |

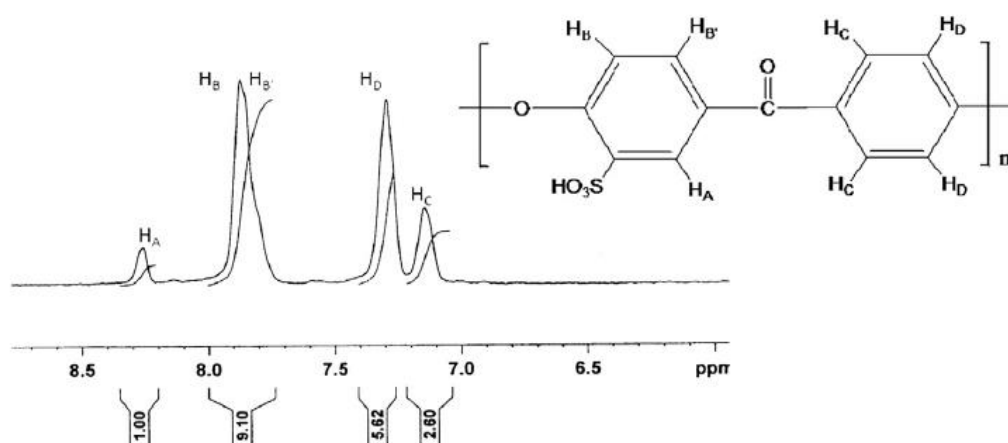

**Figure S1:** <sup>1</sup>H-NMR magnification of sample 2 obtained with the reaction at 100°C for 6 hr.
